# Supplementary material
Source: Springer Nature journal article supplement (https://www.springermedizin.de/resource/supplementary/12889_2012_4936_MOESM9_ESM.pdf/9493046)

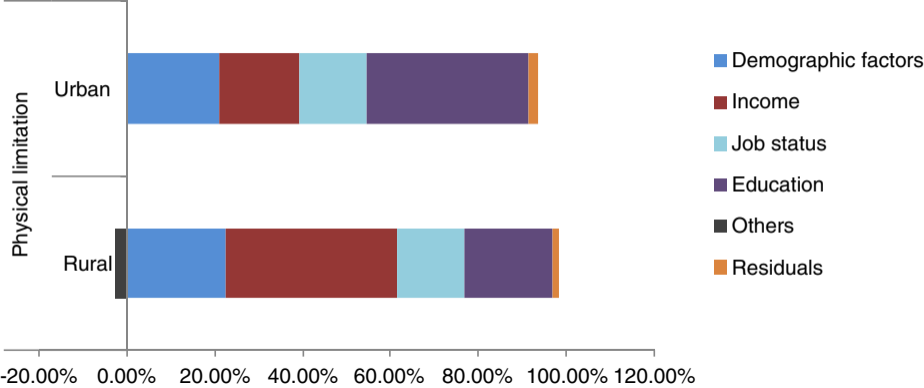

Supplement: MOESM9 [file 9493046]
